# Supplementary material for: Motor competence development of children in Singapore: a cross-sectional and longitudinal study
Source: PeerJ. 2025 Jul 31;13:e19698. doi: 10.7717/peerj.19698 (PMC12318497; doi:10.7717/peerj.19698)
Supplement: Supplemental Information 1 [file peerj-13-19698-s001.xlsx]

## Sheet: P1234 longitudinal (revised)
Subjects	Gender	AGE	AgeP2	AgeP3	AgeP4	RSMD1P1	RSMD1P2	RSMD1P3	RSMD1P4	RSMD2P1	RSMD2P2	RSMD2P3	RSMD2P4	RSMD3P1	RSMD3P2	RSMD3P3	RSMD3P4	RSAC1P1	RSAC1P2	RSAC1P3	RSAC1P4	RSAC2P1	RSAC2P2	RSAC2P3	RSAC2P4	RSBAL1P1	RSBAL1P2	RSBAL1P3	RSBAL1P4	RSBAL2P1	RSBAL2P2	RSBAL2P3	RSBAL2P4	RSBAL3P1	RSBAL3P2	RSBAL3P3	RSBAL3P4
1	1	4.5	5	5	6	20	19	19	19	74	70	60	46	2	0	0	0	5	5	8	6	4	6	6	4	9	12	21	30	10	15	15	15	5	5	5	5
2	1	4.5	5	5	6	30	18	18	20	64	56	50	41	0	0	1	0	7	6	9	8	2	7	5	5	12	25	29	30	15	15	15	15	5	5	5	5
3	1	4	4	5	5	22	24	25	27	48	64	37	57	4	2	0	1	2	4	6	4	2	6	3	2	14	14	18	21	15	15	15	15	5	5	5	5
4	1	4	4	5	5	28	24	23	20	56	48	23	47	2	0	0	0	5	6	5	5	6	4	6	6	3	18	29	30	15	15	15	15	5	5	5	5
5	1	4	4	5	5	22	18	22	19	44	46	47	48	0	0	0	0	6	1	8	9	3	5	2	5	15	11	23	30	15	15	15	15	5	5	5	5
6	1	4	4	5	5	20	24	23	24	62	66	53	40	3	1	0	0	8	7	7	8	2	6	2	6	6	9	5	12	4	15	15	3	5	5	5	1
7	1	4	4	5	5	24	22	21	21	80	76	52	55	0	0	3	0	7	5	6	8	2	4	3	3	15	7	14	27	15	15	15	15	5	5	5	5
8	1	4	4	5	5	24	24	24	20	86	82	51	44	5	1	1	1	6	3	5	6	7	4	4	2	9	6	18	27	15	6	15	15	5	5	5	5
9	1	4	4	5	5	28	22	23	22	72	52	59	42	1	0	2	2	2	6	5	7	1	6	5	7	9	21	27	30	15	15	15	15	5	5	5	5
10	1	4	4	5	5	24	22	21	20	64	40	65	45	5	3	1	1	6	3	4	7	5	0	4	6	22	13	25	17	12	7	15	15	4	4	2	5
11	1	4	4	4	5	24	24	24	17	52	56	44	37	0	2	0	0	10	6	6	9	4	5	4	4	18	18	30	30	15	15	15	15	5	5	5	5
12	1	4	4	4	5	26	28	22	20	80	70	52	40	4	1	2	1	6	5	2	7	4	1	4	2	16	25	24	13	12	15	15	15	5	5	5	5
13	1	4	4	4	5	30	28	26	22	86	84	56	41	4	3	2	1	1	2	3	4	2	5	1	1	2	6	9	9	10	15	15	13	5	5	5	5
14	1	3.5	4	4	5	26	46	18	21	56	98	52	58	3	2	2	1	8	6	7	8	1	4	5	8	6	13	16	28	15	4	15	15	5	5	5	5
15	1	3.5	4	4	5	40	30	30	28	124	112	86	94	14	11	6	4	3	0	0	5	0	0	0	4	2	1	4	3	0	1	2	15	1	1	1	3
16	1	3.5	4	4	5	84	36	24	25	184	132	96	93	15	8	13	4	9	0	0	0	0	0	4	1	15	1	2	6	0	1	0	15	1	1	1	5
17	1	3.5	4	4	5	30	20	24	21	84	50	66	42	0	1	1	0	3	5	4	8	2	5	5	4	13	7	7	30	8	15	15	15	5	5	5	5
18	1	3.5	4	4	5	28	22	20	23	64	66	56	39	4	1	2	4	3	4	9	6	2	4	4	6	23	9	23	18	2	15	15	15	5	5	5	5
19	1	3	3	4	4	28	28	22	22	52	48	66	38	0	2	0	1	3	5	5	6	5	4	1	5	17	15	24	30	15	15	8	15	5	5	5	5
20	1	3	3	4	4	24	30	26	20	48	62	52	46	1	3	1	0	0	5	4	4	5	2	5	4	15	13	16	30	6	15	15	15	5	5	5	5
21	1	3	3	4	4	32	28	22	20	106	84	84	68	11	4	2	1	0	0	6	6	0	0	1	3	6	2	2	6	5	4	8	15	3	5	5	5
22	1	3	3	4	4	20	26	22	22	76	128	84	62	4	5	0	3	1	3	3	6	3	1	3	6	7	4	14	25	3	7	15	15	5	1	5	5
23	1	3	3	4	4	30	30	24	24	108	64	48	30	6	3	0	4	6	1	7	7	3	6	4	2	8	4	13	4	8	10	15	15	5	4	5	5
24	1	3	3	4	4	28	30	26	22	70	68	90	56	2	0	1	0	4	5	3	5	4	3	4	5	4	1	9	30	15	15	4	15	5	5	5	5
25	1	3	3	4	4	34	32	24	24	80	78	70	66	3	2	1	1	0	5	4	5	0	4	3	1	9	7	5	26	15	15	8	15	5	5	5	5
26	1	3	3	3	4	26	22	30	26	96	90	108	86	5	4	6	1	3	3	2	4	4	1	3	4	8	2	1	4	15	15	9	15	4	5	3	5
27	1	3	3	3	4	42	34	26	20	190	116	94	94	15	3	2	1	0	0	0	8	0	1	3	4	1	3	4	5	5	14	10	15	5	5	3	5
28	1	3	3	3	4	38	32	28	24	160	118	66	58	11	9	2	2	0	0	0	4	1	1	4	4	3	10	14	27	9	6	13	15	5	5	5	5
29	1	3	3	3	4	32	36	34	24	82	106	86	68	4	6	3	1	2	2	6	2	2	0	4	6	3	8	3	9	0	3	8	15	4	3	5	5
30	1	3	3	3	4	30	24	28	22	138	86	78	82	10	12	7	0	0	1	3	3	4	4	2	3	2	5	7	10	8	9	13	15	4	5	5	5
31	1	3	3	3	4	32	28	26	20	112	98	54	70	14	8	0	1	0	0	6	7	5	5	5	3	13	5	4	3	15	15	15	15	5	5	5	4
32	1	3	3	3	4	26	22	20	20	78	70	72	44	3	7	0	1	4	3	6	4	0	2	0	6	9	6	8	8	15	15	15	15	5	4	2	5
33	1	3	3	3	4	40	30	28	50	152	96	102	114	13	14	10	1	0	3	6	5	1	1	2	4	3	5	9	7	9	7	15	15	3	2	5	5
34	1	3	3	3	4	24	26	22	18	102	70	82	56	6	3	3	3	0	3	3	4	0	0	2	1	11	10	30	30	10	15	14	15	5	5	5	5
35	1	3	3	3	4	36	34	26	20	86	86	72	50	17	5	1	0	0	0	1	8	2	1	3	6	7	22	9	20	0	9	15	15	1	5	5	5
36	2	4.5	5	5	6	22	21	23	22	54	60	59	42	2	3	5	0	5	9	8	8	8	8	6	7	8	22	19	30	15	15	13	15	5	5	5	5
37	2	4.5	5	5	6	20	21	25	16	74	47	62	41	2	0	1	0	7	0	7	7	3	5	4	6	8	8	5	15	15	15	1	15	5	5	4	5
38	2	4.5	5	5	6	20	21	18	16	68	54	43	34	1	1	0	0	4	5	5	6	3	4	2	7	30	30	27	30	15	15	15	15	5	5	5	5
39	2	4.5	5	5	6	34	23	27	20	64	77	55	55	1	0	2	0	5	5	2	4	2	4	4	3	7	19	28	30	15	10	15	15	5	5	5	5
40	2	4.5	5	5	6	20	18	20	18	70	47	42	45	0	0	0	1	5	3	8	5	2	4	7	5	24	14	25	29	15	15	6	15	5	5	5	5
41	2	4	5	5	5	18	20	21	16	44	53	57	48	4	1	0	1	3	7	7	4	7	3	4	5	12	17	4	13	11	13	15	15	5	5	5	5
42	2	4	4	5	5	26	24	20	18	58	92	55	52	0	0	0	2	6	7	4	6	6	4	6	7	17	26	22	30	0	15	15	15	5	5	5	5
43	2	4	4	5	5	22	20	20	15	90	66	54	58	1	0	0	0	8	7	6	6	5	5	4	5	3	24	23	30	15	15	15	15	4	5	5	5
44	2	4	4	5	5	22	20	20	20	88	70	45	46	0	0	2	1	5	7	8	7	3	4	3	6	20	30	30	25	15	15	15	15	5	5	5	5
45	2	4	4	5	5	26	22	22	22	72	48	52	38	2	1	0	0	1	2	1	5	1	5	2	4	4	6	14	8	15	15	15	15	4	5	5	5
46	2	4	4	4	5	26	26	24	18	86	94	62	39	6	1	1	0	4	5	2	7	5	3	3	5	6	8	3	8	14	5	15	15	5	4	5	5
47	2	3.5	4	4	5	26	22	24	19	52	100	56	47	5	4	3	0	7	6	9	9	6	3	6	6	4	4	6	10	12	15	15	15	5	5	4	5
48	2	3.5	4	4	5	38	22	26	24	116	82	72	65	5	0	1	0	2	3	6	7	4	6	3	3	3	7	11	10	12	11	15	15	1	5	5	5
49	2	3.5	4	4	5	40	28	30	30	116	104	58	66	0	6	4	1	0	1	2	5	1	3	4	7	1	3	4	4	0	11	1	15	3	5	1	5
50	2	3.5	4	4	5	28	24	24	22	72	72	60	53	5	2	2	0	5	5	2	6	2	3	2	6	5	5	8	22	15	15	15	15	5	5	5	5
51	2	3.5	4	4	5	30	34	28	22	92	84	64	50	9	2	7	0	0	5	2	9	7	0	2	8	2	2	2	7	1	7	6	15	5	3	5	5
52	2	3.5	4	4	5	26	28	28	20	72	58	74	40	10	4	2	1	3	3	5	8	0	1	5	6	4	4	4	7	0	8	15	15	5	4	5	5
53	2	3.5	4	4	5	32	22	20	19	92	54	36	56	4	2	0	0	5	6	9	4	5	7	3	3	8	11	14	20	12	15	15	15	5	5	5	5
54	2	3.5	4	4	5	30	28	20	22	104	54	58	51	6	2	0	0	2	5	3	5	1	4	4	4	4	2	11	26	15	15	15	15	5	5	4	5
55	2	3.5	4	4	5	26	26	24	20	72	62	64	44	7	1	1	0	7	3	4	7	3	3	6	5	2	9	18	26	8	15	15	15	5	5	5	5
56	2	3.5	4	4	5	22	26	24	19	64	102	82	58	2	5	2	2	2	6	8	4	5	5	3	4	8	5	30	19	15	12	15	15	5	5	5	5
57	2	3	4	4	4	36	28	24	20	112	72	100	58	6	1	2	1	2	5	3	5	3	2	5	6	10	4	14	29	8	15	15	15	5	5	5	5
58	2	3	4	4	4	24	22	18	20	76	92	58	46	2	1	2	2	3	3	4	6	3	6	5	2	9	4	6	7	13	15	15	15	3	5	3	5
59	2	3	3	4	4	30	28	26	24	110	106	66	60	4	2	2	2	2	7	6	9	7	4	4	4	6	5	4	9	15	12	2	15	5	5	5	5
60	2	3	3	4	4	32	24	26	46	124	116	74	102	8	1	0	0	2	4	4	7	1	7	3	6	4	7	3	22	15	15	15	15	5	5	5	5
61	2	3	3	4	4	28	22	26	20	82	68	64	58	5	4	3	2	1	4	4	7	4	2	6	6	11	5	26	30	15	13	15	15	5	5	5	5
62	2	3	3	4	4	28	24	20	18	66	84	38	34	12	4	4	0	1	0	5	3	2	2	3	4	3	11	4	8	0	7	15	15	5	5	5	5
63	2	3	3	4	4	28	26	28	20	118	118	94	66	15	8	2	1	0	5	0	1	0	4	1	4	1	6	4	6	1	7	4	6	1	5	4	4
64	2	3	3	4	4	30	20	26	22	120	112	82	64	3	4	2	0	0	4	1	3	1	5	4	2	8	6	4	4	15	1	15	15	5	3	2	5
65	2	3	3	4	4	34	32	30	26	120	92	92	90	7	2	0	0	2	5	6	9	2	2	5	3	7	6	4	12	15	8	15	15	5	5	5	5
66	2	3	3	4	4	32	26	22	18	180	118	68	48	8	0	4	0	3	7	5	5	3	1	3	6	4	15	11	17	15	15	15	15	5	5	5	5
67	2	3	3	4	4	24	26	22	22	144	72	102	54	13	0	5	1	2	3	5	8	0	4	3	6	2	6	12	30	0	10	3	15	5	5	5	5
68	2	3	3	4	4	54	30	30	22	134	150	76	70	14	3	0	0	1	1	7	6	1	4	3	4	8	4	2	5	12	9	15	15	5	5	3	5
69	2	3	3	3	4	28	32	30	22	86	112	66	70	10	6	1	1	2	0	7	2	1	2	3	0	3	7	18	13	11	11	15	15	5	5	5	5
70	2	3	3	3	4	28	32	32	24	114	78	92	48	8	1	8	0	3	0	0	1	2	2	3	3	2	18	4	10	0	13	15	15	5	5	5	5
71	2	3	3	3	4	32	28	30	24	84	114	96	54	15	11	4	1	0	0	1	7	6	1	3	5	5	8	5	5	10	11	15	15	5	5	5	5
72	2	3	3	3	4	34	32	26	28	92	120	88	90	14	2	1	1	2	3	6	6	4	2	3	6	9	5	12	16	15	15	3	15	5	5	2	5
73	2	3	3	3	4	34	30	28	22	80	100	60	50	6	11	2	1	2	1	6	9	4	4	3	5	3	8	9	29	9	15	15	15	5	5	5	5
74	2	3	3	3	4	28	32	26	28	98	70	98	104	15	4	3	5	0	0	1	2	0	2	4	6	1	2	7	1	9	15	7	5	4	5	2	2
75	2	3	3	3	4	28	28	28	24	114	76	68	50	13	9	9	1	0	3	4	2	1	2	6	5	2	2	3	8	3	8	8	15	2	3	5	5
		3.46667
		0.522037

## Sheet: Code book
Gender	Gender
1	Female
2	Male
