# Supplementary material for: Motor competence development of children in Singapore: a cross-sectional and longitudinal study
Source: PeerJ. 2025 Jul 31;13:e19698. doi: 10.7717/peerj.19698 (PMC12318497; doi:10.7717/peerj.19698)
Supplement: Supplemental Information 2 [file peerj-13-19698-s002.xlsx]

## Sheet: Code book
Gender	Gender
1	Female
2	Male
